# Supplementary material for: Assessing the Effectiveness of Innovative Pedagogy and Lecture Method on Students Academic Achievement and Retention in Computer Programming
Source: Hindawi journal article supplement (doi:10.1155/2021/5611033), 2021-12-24
Supplement: f1 [file 5611033.f1.docx]

**APPENDIX A**

The study used the CPAT as a pretest, posttest and post-test instrument. Blooms Taxonomy of the cognitive domain following the table of specifications ( see appendix A). CPAT of about 60 questions items were adopted (www.tutorialspoint.com 2019

**TABLE OF SPECIFICATIONS FOR CPAT**

| Topic/content area | Total number of topic | Remembering | Understanding | Application | Evaluation | Creating |
| --- | --- | --- | --- | --- | --- | --- |
| Introduction to computer software, types and application  Problem solving methods and algorithm | 5 | 1 | 1 | 1 | 1 | 1 |
| Structured programming, coding, debugging and documentation | 9 | 1 | 1 | 3 | 1 | 3 |
| VB.net characteristics, language features, syntax  Forms and simple programs | 5 |  |  | 2 | 1 | 2 |
| Program development, sorting and insertion | 10 | 1 | 1 | 2 | 3 | 3 |
| Program development and recursion | 6 |  |  | 2 | 2 | 2 |
| Total | 35 | 3 | 3 | 10 | 8 | 11 |

**A**

**APPENDIX B**

The Computer Programming Assessment Test (CPAT) comprises 35 multiple-choice questions based on the computer programming (CP) course material as shown in appendix B.

**Computer programming Achievement Test (CPAT) for Pretest**

**The time allowed: 1hour**

**REG. NO: ______________ GENDER: ______________ (Male, Female)**

Question

Q 1 - Which of the following is correct about VB.NET?

[A - Visual Basic .NET (VB.NET) is an object-oriented computer programming language implemented on the .NET Framework.](javascript:void(0);)

[B - It is not backwards-compatible with VB6, and any code written in the old version does not compile under VB.NET.](javascript:void(0);)

[C - Both of the above.](javascript:void(0);)

[D - None of the above.](javascript:void(0);)

Q 2 - Which of the following is correct about VB.NET?

[A - VB.NET has complete support for object-oriented concepts. VB.NET has complete support for object-oriented concepts.](javascript:void(0);)

[B - Everything in VB.NET is an object, including all of the primitive types (Short, Integer, Long, String, Boolean, etc.) and user-defined types, events, and even assemblies.](javascript:void(0);)

[C - All objects inherits from the base class Object.](javascript:void(0);)

[D - All of the above.](javascript:void(0);)

Q 3 - Which of the following is an entry point method of VB.NET program?

[A - Sub Main](javascript:void(0);), [B - function main](javascript:void(0);), [C - Both of the above.](javascript:void(0);) [D - None of the above.](javascript:void(0);)

Q 4 - Which of the following is a basic data type in VB.NET?

[A - Boolean](javascript:void(0);), [B - Byte](javascript:void(0);), [C - Char](javascript:void(0);), [D - All of the above.](javascript:void(0);)

Q 5 - Which of the following is a true about Object in VB.NET?

[A - Object variable size is 4 bytes on 32-bit platform.](javascript:void(0);) [B - Object variable size is 8 bytes on 64-bit platform.](javascript:void(0);) [C - Any type can be stored in a variable of type Object.](javascript:void(0);)

[D - All of the above.](javascript:void(0);)

Q 6 - Which of the following converts the expression to Boolean data type in VB.NET?

[A - CBool(expression)](javascript:void(0);), [B - CByte(expression)](javascript:void(0);), [C - CChar(expression)](javascript:void(0);), [D - Date(expression)](javascript:void(0);)

Q 7 - Which of the following converts the expression to Byte data type in VB.NET?

[A - CBool(expression)](javascript:void(0);), [B - CByte(expression)](javascript:void(0);), [C - CChar(expression)](javascript:void(0);),

[D - CDate(expression)](javascript:void(0);)

Q 8 - Which of the following converts the expression to Char data type in VB.NET?

[A - CBool(expression)](javascript:void(0);), [B - CByte(expression)](javascript:void(0);), [C - CChar(expression)](javascript:void(0);)

[D - CDate(expression)](javascript:void(0);)

Q 9 - Which of the following converts the expression to Date data type in VB.NET?

[A - CBool(expression)](javascript:void(0);), [B - CByte(expression)](javascript:void(0);), [C - CChar(expression)](javascript:void(0);)

[D - CDate(expression)](javascript:void(0);).

Q 10 - Which of the following converts the expression to Double data type in VB.NET?

[A - CDbl(expression)](javascript:void(0);), [B - CDec(expression)](javascript:void(0);), [C - CInt(expression)](javascript:void(0);)

[D - CLng(expression)](javascript:void(0);)

Q 11 - Which of the following converts the expression to Decimal data type in VB.NET?

[A - CDbl(expression)](javascript:void(0);), [B - CDec(expression)](javascript:void(0);),[C - CInt(expression)](javascript:void(0);), [D - CLng(expression)](javascript:void(0);)

Q 12 - Which of the following converts the expression to Integer data type in VB.NET?

[A - CDbl(expression)](javascript:void(0);), [B - CDec(expression)](javascript:void(0);), [C - CInt(expression)](javascript:void(0);), [D - CLng(expression)](javascript:void(0);)

Q 13 - Which of the following converts the expression to Long data type in VB.NET?

[A - CDbl(expression)](javascript:void(0);), [B - CDec(expression)](javascript:void(0);), [C - CInt(expression)](javascript:void(0);), [D - CLng(expression)](javascript:void(0);)

Q 14 - Which of the following converts the expression to Object data type in VB.NET?

[A - CObj(expression)](javascript:void(0);), [B - CSByte(expression)](javascript:void(0);), [C - CShort(expression)](javascript:void(0);),

[D - CSng(expression)](javascript:void(0);)

Q 15 - Which of the following converts the expression to SByte data type in VB.NET?

[A - CObj(expression)](javascript:void(0);), [B - CSByte(expression)](javascript:void(0);), [C - CShort(expression)](javascript:void(0);)

[D - CSng(expression)](javascript:void(0);)

Q 16 - Which of the following converts the expression to Short data type in VB.NET?

[A - CObj(expression)](javascript:void(0);), [B - CSByte(expression)](javascript:void(0);), [C - CShort(expression)](javascript:void(0);)

[D - CSng(expression)](javascript:void(0);)

Q 17 - Which of the following converts the expression to a Single data type in VB.NET?

[A - CObj(expression)](javascript:void(0);), [B - CSByte(expression)](javascript:void(0);), [C - CShort(expression)](javascript:void(0);),

[D - CSng(expression)](javascript:void(0);)

Q 18 - Which of the following converts the expression to String data type in VB.NET?

[A - CStr(expression)](javascript:void(0);), [B - CSByte(expression)](javascript:void(0);), [C - CShort(expression)](javascript:void(0);)

[D - CSng(expression)](javascript:void(0);)

Q 19 - Which of the following accesss modifier specifies that Visual Basic should marshal all strings to American National Standards Institute (ANSI) values regardless of the name of the external procedure being declared in VB.NET?

[A - Ansi](javascript:void(0);), [B - Assembly](javascript:void(0);)’ [C - Async](javascript:void(0);), [D - Auto](javascript:void(0);)

Q 20 - Which of the following accesss modifier specifies that an attribute at the beginning of a source file applies to the entire assembly?

[A - Ansi](javascript:void(0);), [B - Assembly](javascript:void(0);), [C - Async](javascript:void(0);), [D - Auto](javascript:void(0);)

Q 21 - Which of the following access modifier indicates that the method or lambda expression that it modifies is asynchronous?

[A - Ansi](javascript:void(0);), [B - Assembly](javascript:void(0);), [C - Async](javascript:void(0);), [D - Auto](javascript:void(0);)

Q 22 - Which of the following access modifier specifies that Visual Basic should marshal strings according to .NET Framework rules?

[A - Ansi](javascript:void(0);), [B - Assembly](javascript:void(0);), [C - Async](javascript:void(0);), [D - Auto](javascript:void(0);)

Q 23 - Which of the following accesss modifier specifies that an argument is passed by reference?

[A - ByRef](javascript:void(0);), [B - ByVal](javascript:void(0);), [C - Default](javascript:void(0);), [D - Friend](javascript:void(0);)

Q 24 - Which of the following is true about catch block in VB.NET?

[A - A program catches an exception with an exception handler at the place in a program where you want to handle the problem,](javascript:void(0);) [C - Both of the above.](javascript:void(0);) [D - None of the above.](javascript:void(0);)

Q 25 - Which of the following accesss modifier specifies that an argument is passed in such a way that the called procedure or property cannot change the value of a variable underlying the argument in the calling code?

[A - ByRef](javascript:void(0);), [B - ByVal](javascript:void(0);), [C - Default](javascript:void(0);), [D - Friend](javascript:void(0);)

26 - What is the worst case time complexity of linear search algorithm?

[A - Ο(1)](javascript:void(0);), [B - Ο(n)](javascript:void(0);), [C - Ο(log n)](javascript:void(0);), [D - Ο(n2)](javascript:void(0);)

27 - What is the worst case run-time complexity of binary search algorithm?

[A - Ο(n2)](javascript:void(0);), [B - Ο(nlog n)](javascript:void(0);), [C - Ο(n3)](javascript:void(0);), [D - Ο(n)](javascript:void(0);)

28 - Which of the following usees FIFO method

[A - Queue](javascript:void(0);), [B - Stack](javascript:void(0);), [C - Hash Table](javascript:void(0);) [D - Binary Search Tree](javascript:void(0);)

29 - What is the output of the following program?

#include<stdio.h>

main()

{

printf("\");

}

[A - \](javascript:void(0);), [B - \"](javascript:void(0);), [C - "](javascript:void(0);), [D - Compile error](javascript:void(0);)

30 - What is the output of the following program?

#include<stdio.h>

{

int x = 1;

switch(x)

{

default: printf("Hello");

case 1: printf("hi"); break;

}

}

[A - Hello](javascript:void(0);), [B - Hi](javascript:void(0);), [C - HelloHi](javascript:void(0);), [D - Compile error](javascript:void(0);)

31 - What is the output of the following program?

#include<stdio.h>

main()

{

int i = 13, j = 60;

i ^= j;

j ^= i;

i ^= j;

printf("%d %d", i, j);

}

[A - 73 73](javascript:void(0);), [B - 60 13](javascript:void(0);), [C - 13 60](javascript:void(0);), [D - 60 60](javascript:void(0);)

32 - What is the output of the following program?

#include<stdio.h>

main()

{

union abc {

int x;

char ch;

}var;

var.ch = 'A';

printf("%d", var.x);

}

[A - A](javascript:void(0);), [B - Garbage value](javascript:void(0);), [C - 65](javascript:void(0);), [D - 97](javascript:void(0);)

33 - What is the output of the following program?

#include<stdio.h>

main()

{

int i = 1;

while(i++<=5);

printf("%d ",i++);

}

[A - 4](javascript:void(0);), [B - 6](javascript:void(0);), [C - 2 6](javascript:void(0);), [D - 2 4](javascript:void(0);)

Q 34 - What is the output of the following program?

#include<stdio.h>

main()

{

int x = 1;

do

printf("%d ", x);

while(x++<=1);

}

[A - 1](javascript:void(0);), [B - 1 2](javascript:void(0);), [C - No output](javascript:void(0);), [D - Compile error](javascript:void(0);)

Q 35 - What is the output of the following program?

#include<stdio.h>

main()

{

int a[] = {1,2}, *p = a;

printf("%d", p[1]);

}

[A - 1](javascript:void(0);), [B - 2](javascript:void(0);), [C - Compile error](javascript:void(0);), [D - Runtime error](javascript:void(0);)

| **Question Number** | **Answer Key** |
| --- | --- |
| 1 | C |
| 2 | D |
| 3 | A |
| 4 | D |
| 5 | D |
| 6 | A |
| 7 | B |
| 8 | C |
| 9 | D |
| 10 | A |
| 11 | B |
| 12 | C |
| 13 | D |
| 14 | A |
| 15 | B |
| 16 | C |
| 17 | D |
| 18 | A |
| 19 | A |
| 20 | B |
| 21 | C |
| 22 | D |
| 23 | A |
| 24 | C |
| 25 | B |
| 26 | A |
| 27 | A |
| 28 | A |
| 29 | D |
| 30 | B |
| 31 | B |
| 32 | C |
| 33 | B |
| 34 | B |
| 35 | B |

**APPENDIX C**

**TRAINING GUIDE FOR COMPUTER PROGRAMMINGON HOW TO USE THE INNOVATIVE PEDAGOGYTOOL (IP) TECHNIQUE IN THE CLASSROOM**

The IP package was developed by the researcher

**SUMMARY OF INSTRUCTIONAL PROCEDURE**

| **Steps** | **Contents** | **Teacher’s Activities** | **Students’ Activities** |
| --- | --- | --- | --- |
| 1  2  3 | **Introduction to the lesson**  **Content continues** | The teacher asks students a question to ascertain their prior knowledge on the topic;   - Set induction   **The teacher uses CBL to illustrate the act of programming by Step1: Content-Handling.**  The teacher starts the steps involved in computer programming to the students;   - Lesson content   The teacher ask students a question to ascertain their level of understanding  Step2: **Regulating students learning**  goggle classroom platform. The teacher explained computer programming with a PowerPoint presentation relating the content  The teacher explains the following to the students   - The question to experience step 1   The teacher asks the students to put down their questions based on the explanation so far.  Step3: **Teachers teaching emphasis**  The teacher explains the YouTube video that illustrates procedures for different programming.  The teacher gives a task to the students to explain with examples | The students answer a question asked by the teacher  The students listen and write down as the teacher explains the PowerPoint presentation in the goggle classroom  The students listen and write a note down an important point from the teacher.  The students watch the video ad note down their questions.  The students attempt questions given by the teacher.  The students listen and note down as the teacher explains |
| 4 | Lesson content continues  (The task is in line with step 2) | **Step4: Linking the group activities**  The teacher guides the group activity as the group write the flowchart for the task for installation  The teacher guides the students as they develop steps in installation computer software.  The teacher checks each group in the platform to see and guide the progress of each group  **Step6: Organize the students**  The teacher asked the students to go to their group on the platform | **Step5: Application**  The students work with their group to write the flow chart. Also, apply what the group demonstrated in the presentation  Students learnt the topics through sharing, replying and communicating and **cooperating on the platform**  Each group of the students write down the identified problem, a step taken to solve(**implemen**t) their problem  The students in each group can explain the steps and how installation computer software. Also using the knowledge in other tasks relating to software installation (**transfer**) |
| 5 | Task application | **The teacher uses PBL to create experiential learning.**  **Step1: Experiencing the content**  The teacher gives exclusive learning activities that help students to gain experience related to the concept they are learning.  Step5: **Teachers guide**  The teacher ensures that each group solution is in line with the set task  Step7: The teacher assesses the students and scores them.   - Group A. - Group B - Group C   The teacher also gives the necessary correction, reinforcement and rewards the students | Step2: **Problem Identification**  The students surf the internet and consult other material on how to solve the problem (develop the program)  Step3: **Brainstorming**  The students suggest possible explanations on the concept of structure and unstructured programs and also try to find a solution.  Step4: **Review steps 2 and 3** Arrange explanation into organized answers and structure the answer concerning the developing program given in step 1.  Step6: **Submission and presentation**  Group leader submit to the teacher the structured and unstructured program that will solve mean, median and mode deviation respectively.  Group leader also makes presentation about the task given |
| 6 | Assessment of Learning (Evaluation) | The teacher asks the students to attempt the questions in the manual   - The objective of the lesson | The students answer the questions |

**DATA SET**

**1 F 60.00 70.00 20 60 70 1 M 60.00 25 60 70.00 70 ESUT 20.00 60.00 2.00 70.00**

**2 F 60.00 60.00 20 60 60 2 M 51.00 16 51 70.00 70 ESUT 20.00 60.00 2.00 60.00**

**3 F 70.00 65.00 16 70 65 3 M 62.00 30 62 60.00 60 ESUT 16.00 70.00 2.00 65.00**

**4 F 80.00 70.00 35 80 70 4 M 64.00 17 64 70.00 70 ESUT 35.00 80.00 2.00 70.00**

**5 F 81.00 70.00 27 81 70 5 M 65.00 18 65 70.00 70 ESUT 27.00 81.00 2.00 70.00**

**6 F 71.00 65.00 10 71 65 6 M 66.00 20 66 80.00 60 ESUT 10.00 71.00 2.00 65.00**

**7 F 72.00 70.00 20 72 70 7 M 67.00 25 67 80.00 70 ESUT 20.00 72.00 2.00 70.00**

**8 F 77.00 70.00 20 77 70 8 M 69.00 30 69 50.00 65 ESUT 20.00 77.00 2.00 70.00**

**9 F 60.00 55.00 24 60 55 9 F 70.00 31 70 70.00 70 ESUT 24.00 60.00 2.00 55.00**

**10 F 51.00 50.00 20 51 50 10 F 71.00 30 71 65.00 65 ESUT 20.00 51.00 2.00 50.00**

**11 F 52.00 50.00 26 52 50 11 F 60.00 30 60 55.00 55 ESUT 26.00 52.00 2.00 50.00**

**12 F 55.00 50.00 27 55 50 12 F 61.00 23 61 54.00 54 ESUT 27.00 55.00 2.00 50.00**

**13 F 45.00 40.00 28 45 40 13 F 50.00 24 50 45.00 45 ESUT 28.00 45.00 2.00 40.00**

**14 F 46.00 70.00 42 46 70 14 F 52.00 32 52 50.00 50 ESUT 42.00 46.00 2.00 70.00**

**15 F 51.00 70.00 10 51 70 15 F 51.00 30 51 70.00 70 ESUT 10.00 51.00 2.00 70.00**

**16 F 57.00 70.00 19 57 50 16 F 45.00 29 45 70.00 70 ESUT 19.00 57.00 2.00 50.00**

**17 F 60.00 75.00 38 60 55 17 F 46.00 28 46 65.00 65 ESUT 38.00 60.00 2.00 55.00**

**18 F 61.00 78.00 32 61 58 18 F 48.00 26 48 65.00 65 ESUT 32.00 61.00 2.00 58.00**

**19 F 72.00 58.00 15 72 58 19 F 47.00 27 47 65.00 65 ESUT 15.00 72.00 2.00 58.00**

**20 F 50.00 75.00 20 50 45 20 F 48.00 25 48 40.00 70 ESUT 20.00 50.00 2.00 45.00**

**21 F 71.00 70.00 20 71 70 21 F 49.00 18 49 45.00 56 ESUT 20.00 71.00 2.00 70.00**

**22 F 73.00 70.00 10 73 70 22 F 42.00 17 42 45.00 70 ESUT 10.00 73.00 2.00 70.00**

**23 F 76.00 70.00 10 76 70 23 F 46.00 15 46 45.00 70 ESUT 10.00 76.00 2.00 70.00**

**24 F 79.00 74.00 15 79 74 24 F 47.00 10 47 45.00 70 ESUT 15.00 79.00 2.00 74.00**

**25 F 81.00 76.00 12 81 56 25 F 48.00 10 48 45.00 60 ESUT 12.00 81.00 2.00 56.00**

**26 F 62.00 74.00 10 62 64 26 F 50.00 12 50 45.00 45 ESUT 10.00 62.00 2.00 64.00**

**27 F 61.00 78.00 10 61 58 27 F 52.00 18 52 50.00 50 ESUT 10.00 61.00 2.00 58.00**

**28 F 64.00 79.00 35 64 59 28 F 57.00 19 57 70.00 70 ESUT 35.00 64.00 2.00 59.00**

**29 F 65.00 70.00 10 65 60 29 F 59.00 10 59 65.00 65 ESUT 10.00 65.00 2.00 60.00**

**30 F 69.00 75.00 17 69 65 ESUT 17.00 69.00 2.00 65.00**

**31 F 69.00 75.00 18 69 65 ESUT 18.00 69.00 2.00 65.00**

**32 M 81.00 80.00 32 81 80 ESUT 32.00 81.00 1.00 80.00**

**33 M 82.00 82.00 40 82 82 ESUT 40.00 82.00 1.00 82.00**

**34 M 81.00 78.00 40 81 78 ESUT 40.00 81.00 1.00 78.00**

**35 M 82.00 76.00 41 82 76 ESUT 41.00 82.00 1.00 76.00**

**36 M 55.00 78.00 35 55 54 ESUT 35.00 55.00 1.00 54.00**

**37 M 62.00 60.00 39 62 60 ESUT 39.00 62.00 1.00 60.00**

**38 M 67.00 85.00 41 67 65 ESUT 41.00 67.00 1.00 65.00**

**39 M 81.00 80.00 46 81 80 ESUT 46.00 81.00 1.00 80.00**

**40 M 81.00 80.00 37 81 78 ESUT 37.00 81.00 1.00 78.00**

**41 M 50.00 90.00 49 50 45 ESUT 49.00 50.00 1.00 45.00**

**UNN 25.00 60.00 1.00 70.00**

**UNN 16.00 51.00 1.00 70.00**

**UNN 30.00 62.00 1.00 60.00**

**UNN 17.00 64.00 1.00 70.00**

**UNN 18.00 65.00 1.00 70.00**

**UNN 20.00 66.00 1.00 60.00**

**UNN 25.00 67.00 1.00 70.00**

**UNN 30.00 69.00 1.00 65.00**

**UNN 31.00 70.00 2.00 70.00**

**UNN 30.00 71.00 2.00 65.00**

**UNN 30.00 60.00 2.00 55.00**

**UNN 23.00 61.00 2.00 54.00**

**UNN 24.00 50.00 2.00 45.00**

**UNN 32.00 52.00 2.00 50.00**

**UNN 30.00 51.00 2.00 70.00**

**UNN 29.00 45.00 2.00 70.00**

**UNN 28.00 46.00 2.00 65.00**

**UNN 26.00 48.00 2.00 65.00**

**UNN 27.00 47.00 2.00 65.00**

**UNN 25.00 48.00 2.00 70.00**

**UNN 18.00 49.00 2.00 56.00**

**UNN 17.00 42.00 2.00 70.00**

**UNN 15.00 46.00 2.00 70.00**

**UNN 10.00 47.00 2.00 70.00**

**UNN 10.00 48.00 2.00 60.00**

**UNN 12.00 50.00 2.00 45.00**

**UNN 18.00 52.00 2.00 50.00**

**UNN 19.00 57.00 2.00 70.00**

**UNN 10.00 59.00 2.00 65.00**
